# Supplementary material for: Characterization of the Limbal Epithelial Stem Cell Niche
Source: PubMed Central journal article supplement (PMC10619699; doi:10.1167/iovs.64.13.48), 2023-10-31
Supplement: iovs-64-13-48_s002.pdf [file iovs-64-13-48_s002.pdf]

Supplementary Table 1

Table 1: Sequences of primers used for real time PCR

| Gene          | Accession number | Primers | Forward                | Reverse                |
|---------------|------------------|---------|------------------------|------------------------|
| <i>Chst10</i> | NM_145142.2      | 1       | GCCGATGTACGAGGACCAT    | TTCCATCACGGACCATCTGC   |
|               |                  | 2       | CGCCGATGTACGAGGACCAT   | TCACATTGCCAAGCTGGACT   |
| <i>Itih5</i>  | NM_172471.2      | 1       | CCTGCAGGATGCTCAACAGA   | ACGCTGTCTCCTATAAGCATGG |
|               |                  | 2       | TATGCCTTCACCACGGTGTC   | CGCTGTCTCCTATAAGCATGG  |
| <i>Itih2</i>  | NM_010582.3      | 1       | TGCCTCAGAGTGTCTGTGTTTC | ATGCCGTTACAGTCATGGT    |
|               |                  | 2       | TCCTGAGAACCTGGACCCAA   | GCCTCCACAGTCTGCTTCAT   |
| <i>Tgfb1</i>  | NM_011577.2      | 1       | GCTGAACCAAGGAGACGGAA   | ATGTCATGGATGGTGCCCAG   |
|               |                  | 2       | CTGCTGACCCCCACTGATAC   | AGCCCTGTATTCCGTCTCCT   |
| <i>Tgfb2</i>  | NM_001329107.1   | 1       | CTGTGGGTACCTTGATGCCA   | CTCTGGCTTTGGGGTTTTGC   |
|               |                  | 2       | CTCCCCTCCGAAACTGTCTG   | CTGTCTGGAGCAAAGCTGC    |
| <i>Tgfb3</i>  | NM_009368.3      | 1       | GAAGAGATGCACGGGGAGAG   | CAGACGGCCAGTTCATTGTG   |
|               |                  | 2       | TTACTGCTTCCGCAACCTGG   | AGGTTCGTGGACCCATTTC    |
| <i>Gapdh</i>  | NM_001289726.1   | 1       | AACAGCAACTCCCCTCTTC    | CCTGTTGCTGTAGCCGTATT   |
| <i>Actb</i>   | NM_007393.5      | 1       | CACTGTCGAGTCGCGTCC     | TCATCCATGGCGAACTGGTG   |
